# Supplementary material for: A decade of study on the condition of western Cuban coral reefs, with low human impact
Source: PeerJ journal article supplement (doi:10.7717/peerj.15953), 2023-08-31
Supplement: Figtables.pdf [file Figtables.pdf]

## A decade of study on the condition of western Cuban coral reefs, with low human impact

Hansel Caballero Aragón, Susana Perera Valderrama, Dorka Cobián Rojas, Zaimiuri Hernández Gonzáles, Juliet González-Méndez, Elena de la Guardia Llansó.

### Supplementary Materials

Table S1. Functional coefficient (FC) for each species of Guanahacabibes coral reefs, according to the criteria of González-Barrios and Álvarez-Fillip (2018).

| Species                          | FC   |
|----------------------------------|------|
| <i>Agaricia agaricites</i>       | 0.19 |
| <i>Acropora cervicornis</i>      | 0.62 |
| <i>Agaricia granmahe</i>         | 0.12 |
| <i>Agaricia lamarcki</i>         | 0.08 |
| <i>Agaricia tenuifolia</i>       | 0.26 |
| <i>Colpophyllia natans</i>       | 0.26 |
| <i>Dichocoenia stockesi</i>      | 0.15 |
| <i>Diploria laberyntiformis</i>  | 0.28 |
| <i>Eusmilia fastigiata</i>       | 0.23 |
| <i>Helioseris cucullata</i>      | 0.03 |
| <i>Isophyllia sinuosa</i>        | 0.07 |
| <i>Madracis decactis</i>         | 0.28 |
| <i>Madracis mirabilis</i>        | 0.16 |
| <i>Manicina areolata</i>         | 0.17 |
| <i>Meandrina meandrites</i>      | 0.12 |
| <i>Montastraea cavernosa</i>     | 0.32 |
| <i>Mussa angulosa</i>            | 0.09 |
| <i>Mycetophyllia aliciae</i>     | 0.06 |
| <i>Mycetophyllia danana</i>      | 0.04 |
| <i>Mycetophyllia ferox</i>       | 0.02 |
| <i>Mycetophyllia lamarckiana</i> | 0.04 |
| <i>Orbicella annularis</i>       | 0.47 |
| <i>Orbicella Faveolata</i>       | 0.42 |
| <i>Orbicella franksi</i>         | 0.43 |
| <i>Porites astreoides</i>        | 0.18 |
| <i>Porites divaricata</i>        | 0.11 |
| <i>Porites furcata</i>           | 0.11 |
| <i>Porites porites</i>           | 0.22 |
| <i>Pseudodiploria strigosa</i>   | 0.30 |
| <i>Scolymia lacera</i>           | 0.09 |
| <i>Siderastrea radians</i>       | 0.04 |
| <i>Siderastrea siderea</i>       | 0.19 |
| <i>Stephanocoenia stockesi</i>   | 0.08 |

Table S2. Mean (AVE) and standard deviation (SD) of living coral cover (%) per site and year. CP: Cuevas de Pedro, YE: Yemayá, VE: Veral, and VR: Verraco.

| Site | Year | AVE  | SD  |
|------|------|------|-----|
| CP   | 2008 | 23,3 | 6,6 |
| CP   | 2010 | 21,2 | 8,9 |
| CP   | 2011 | 21,9 | 7,7 |
| CP   | 2012 | 22,1 | 6,3 |
| CP   | 2013 | 22,3 | 6,3 |
| CP   | 2014 | 22,0 | 7,9 |
| CP   | 2015 | 21,3 | 3,5 |
| CP   | 2016 | 17,8 | 3,6 |
| CP   | 2017 | 17,6 | 6,9 |
| YE   | 2008 | 19,7 | 4,5 |
| YE   | 2010 | 22,2 | 7,6 |
| YE   | 2011 | 21,6 | 5,7 |
| YE   | 2012 | 22,2 | 7,1 |
| YE   | 2013 | 22,5 | 9,6 |
| YE   | 2014 | 19,2 | 5,3 |
| YE   | 2015 | 18,2 | 4,6 |
| YE   | 2016 | 15,1 | 4,1 |
| YE   | 2017 | 14,6 | 4,1 |
| VE   | 2008 | 16,0 | 8,8 |
| VE   | 2010 | 14,1 | 4,1 |
| VE   | 2011 | 14,3 | 4,4 |
| VE   | 2012 | 16,7 | 5,1 |
| VE   | 2013 | 14,7 | 6,6 |
| VE   | 2014 | 14,3 | 3,4 |
| VE   | 2015 | 16,0 | 6,6 |
| VE   | 2016 | 14,9 | 9,2 |
| VE   | 2017 | 14,6 | 8,0 |
| VR   | 2008 | 13,0 | 2,9 |
| VR   | 2010 | 14,1 | 4,1 |
| VR   | 2011 | 16,0 | 6,9 |
| VR   | 2012 | 14,4 | 4,8 |
| VR   | 2013 | 13,9 | 4,9 |
| VR   | 2014 | 14,4 | 6,4 |
| VR   | 2015 | 15,9 | 4,7 |
| VR   | 2016 | 13,8 | 6,5 |
| VR   | 2017 | 13,8 | 5,5 |

Table S3. Pair wise test analysis for living coral cover. CP: Cuevas de Pedro, YE: Yemayá, VE: Veral, and VR: Verraco, s: site.

| Groups     | t    | P(perm) | perms |
|------------|------|---------|-------|
| 2008, 2010 | 0.08 | 0.870   | 9834  |
| 2008, 2011 | 0.39 | 0.645   | 9826  |
| 2008, 2012 | 1.10 | 0.358   | 9835  |
| 2008, 2013 | 0.36 | 0.703   | 9822  |
| 2008, 2014 | 0.73 | 0.508   | 9825  |
| 2008, 2015 | 0.13 | 0.930   | 9839  |
| 2008, 2016 | 1.77 | 0.198   | 9841  |
| 2008, 2017 | 1.83 | 0.177   | 9829  |
| 2010, 2011 | 1.03 | 0.378   | 9832  |
| 2010, 2012 | 1.57 | 0.230   | 9847  |
| 2010, 2013 | 1.48 | 0.236   | 9821  |
| 2010, 2014 | 0.49 | 0.582   | 9830  |
| 2010, 2015 | 0.05 | 0.994   | 9859  |
| 2010, 2016 | 1.42 | 0.033   | 9833  |
| 2010, 2017 | 1.49 | 0.025   | 9830  |
| 2011, 2012 | 0.47 | 0.664   | 9849  |
| 2011, 2013 | 0.18 | 0.816   | 9850  |
| 2011, 2014 | 1.62 | 0.236   | 9834  |
| 2011, 2015 | 0.62 | 0.586   | 9833  |
| 2011, 2016 | 2.07 | 0.027   | 9830  |
| 2011, 2017 | 2.15 | 0.034   | 9847  |
| 2012, 2013 | 0.98 | 0.451   | 9814  |
| 2012, 2014 | 1.75 | 0.213   | 9838  |
| 2012, 2015 | 0.93 | 0.453   | 9814  |
| 2012, 2016 | 2.43 | 0.006   | 9814  |
| 2012, 2017 | 2.42 | 0.013   | 9836  |
| 2013, 2014 | 1.05 | 0.473   | 9835  |
| 2013, 2015 | 0.37 | 0.764   | 9843  |
| 2013, 2016 | 1.65 | 0.022   | 9829  |
| 2013, 2017 | 1.71 | 0.021   | 9835  |
| 2014, 2015 | 0.52 | 0.594   | 9835  |
| 2014, 2016 | 1.71 | 0.227   | 9843  |
| 2014, 2017 | 1.82 | 0.202   | 9854  |
| 2015, 2016 | 4.32 | 0.038   | 9838  |
| 2015, 2017 | 4.49 | 0.036   | 9849  |
| 2016, 2017 | 2.04 | 0.137   | 9795  |

Table S4. Mean (AVE) and standard deviation (SD) of fleshy algae index per site and year. CP: Cuevas de Pedro, YE: Yemayá, VE: Veral, and VR: Verraco.

| Site | Year | AVE   | SD    |
|------|------|-------|-------|
| CP   | 2008 | 169,0 | 127,6 |
| CP   | 2010 | 93,0  | 104,3 |
| CP   | 2011 | 111,9 | 131,6 |
| CP   | 2012 | 237,2 | 244,6 |
| CP   | 2013 | 273,8 | 305,7 |
| CP   | 2014 | 216,2 | 189,7 |
| CP   | 2015 | 151,7 | 152,7 |
| CP   | 2016 | 321,1 | 277,8 |
| CP   | 2017 | 296,5 | 235,4 |
| YE   | 2008 | 169,4 | 123,0 |
| YE   | 2010 | 103,3 | 108,3 |
| YE   | 2011 | 31,8  | 81,6  |
| YE   | 2012 | 87,3  | 68,7  |
| YE   | 2013 | 132,7 | 90,5  |
| YE   | 2014 | 135,4 | 140,9 |
| YE   | 2015 | 134,1 | 174,4 |
| YE   | 2016 | 231,4 | 271,7 |
| YE   | 2017 | 264,7 | 245,8 |
| VE   | 2008 | 145,2 | 92,4  |
| VE   | 2010 | 86,7  | 78,0  |
| VE   | 2011 | 68,0  | 57,6  |
| VE   | 2012 | 69,3  | 60,4  |
| VE   | 2013 | 192,0 | 242,0 |
| VE   | 2014 | 184,2 | 192,8 |
| VE   | 2015 | 111,6 | 113,1 |
| VE   | 2016 | 146,1 | 182,1 |
| VE   | 2017 | 189,6 | 222,4 |
| VR   | 2008 | 167,3 | 105,7 |
| VR   | 2010 | 102,4 | 84,8  |
| VR   | 2011 | 110,2 | 106,2 |
| VR   | 2012 | 182,4 | 204,4 |
| VR   | 2013 | 195,9 | 235,0 |
| VR   | 2014 | 196,9 | 199,3 |
| VR   | 2015 | 165,3 | 163,1 |
| VR   | 2016 | 209,2 | 177,8 |
| VR   | 2017 | 221,5 | 212,7 |

Table S5. Pair wise test analysis for fleshy algae index. CP: Cuevas de Pedro, YE: Yemayá, VE: Veral, and VR: Verraco, s: site.

| Within level 'CP' of factor 'site' |      |         |       | Within level 'YE' of factor 's' |      |         |       | Within level 'VE' of factor 's' |       |         |       | Within level 'VR' of factor 's' |      |         |       |
|------------------------------------|------|---------|-------|---------------------------------|------|---------|-------|---------------------------------|-------|---------|-------|---------------------------------|------|---------|-------|
| Groups                             | t    | P(perm) | perms | Groups                          | t    | P(perm) | perms | Groups                          | t     | P(perm) | perms | Groups                          | t    | P(perm) | perms |
| 2008, 2010                         | 2.18 | 0.032   | 152   | 2008, 2010                      | 0.78 | 0.456   | 67    | 2008, 2010                      | 1.62  | 0.111   | 132   | 2008, 2010                      | 2.18 | 0.032   | 152   |
| 2008, 2011                         | 0.06 | 0.958   | 343   | 2008, 2011                      | 3.17 | 0.002   | 196   | 2008, 2011                      | 3.44  | 0.001   | 158   | 2008, 2011                      | 0.06 | 0.958   | 343   |
| 2008, 2012                         | 3.18 | 0.001   | 408   | 2008, 2012                      | 4.31 | 0.000   | 346   | 2008, 2012                      | 4.69  | 0.000   | 282   | 2008, 2012                      | 3.18 | 0.001   | 408   |
| 2008, 2013                         | 4.08 | 0.000   | 434   | 2008, 2013                      | 1.16 | 0.256   | 1361  | 2008, 2013                      | 4.72  | 0.000   | 2403  | 2008, 2013                      | 4.08 | 0.000   | 434   |
| 2008, 2014                         | 6.04 | 0.000   | 236   | 2008, 2014                      | 1.53 | 0.127   | 397   | 2008, 2014                      | 7.49  | 0.000   | 410   | 2008, 2014                      | 6.04 | 0.000   | 236   |
| 2008, 2015                         | 3.06 | 0.002   | 235   | 2008, 2015                      | 3.24 | 0.002   | 2114  | 2008, 2015                      | 1.85  | 0.069   | 198   | 2008, 2015                      | 3.06 | 0.002   | 235   |
| 2008, 2016                         | 5.07 | 0.000   | 1339  | 2008, 2016                      | 4.81 | 0.000   | 1804  | 2008, 2016                      | 2.63  | 0.008   | 676   | 2008, 2016                      | 5.07 | 0.000   | 1339  |
| 2008, 2017                         | 5.49 | 0.000   | 1632  | 2008, 2017                      | 5.62 | 0.000   | 1977  | 2008, 2017                      | 7.01  | 0.000   | 365   | 2008, 2017                      | 5.49 | 0.000   | 1632  |
| 2010, 2011                         | 1.77 | 0.080   | 334   | 2010, 2011                      | 2.40 | 0.019   | 199   | 2010, 2011                      | 2.07  | 0.044   | 159   | 2010, 2011                      | 1.77 | 0.080   | 334   |
| 2010, 2012                         | 3.92 | 0.000   | 416   | 2010, 2012                      | 3.32 | 0.001   | 345   | 2010, 2012                      | 3.22  | 0.002   | 258   | 2010, 2012                      | 3.92 | 0.000   | 416   |
| 2010, 2013                         | 4.81 | 0.000   | 430   | 2010, 2013                      | 0.64 | 0.532   | 954   | 2010, 2013                      | 5.21  | 0.000   | 2413  | 2010, 2013                      | 4.81 | 0.000   | 430   |
| 2010, 2014                         | 7.74 | 0.000   | 252   | 2010, 2014                      | 2.25 | 0.022   | 407   | 2010, 2014                      | 8.75  | 0.000   | 426   | 2010, 2014                      | 7.74 | 0.000   | 252   |
| 2010, 2015                         | 4.47 | 0.000   | 240   | 2010, 2015                      | 3.71 | 0.001   | 2124  | 2010, 2015                      | 2.96  | 0.004   | 199   | 2010, 2015                      | 4.47 | 0.000   | 240   |
| 2010, 2016                         | 6.32 | 0.000   | 1375  | 2010, 2016                      | 5.19 | 0.000   | 1848  | 2010, 2016                      | 3.69  | 0.001   | 689   | 2010, 2016                      | 6.32 | 0.000   | 1375  |
| 2010, 2017                         | 6.82 | 0.000   | 1700  | 2010, 2017                      | 6.02 | 0.000   | 2002  | 2010, 2017                      | 7.86  | 0.000   | 382   | 2010, 2017                      | 6.82 | 0.000   | 1700  |
| 2011, 2012                         | 3.03 | 0.003   | 421   | 2011, 2012                      | 0.29 | 0.777   | 330   | 2011, 2012                      | 0.82  | 0.416   | 286   | 2011, 2012                      | 3.03 | 0.003   | 421   |
| 2011, 2013                         | 3.90 | 0.000   | 827   | 2011, 2013                      | 1.03 | 0.320   | 967   | 2011, 2013                      | 5.83  | 0.000   | 2507  | 2011, 2013                      | 3.90 | 0.000   | 827   |
| 2011, 2014                         | 5.29 | 0.000   | 490   | 2011, 2014                      | 4.38 | 0.000   | 424   | 2011, 2014                      | 9.52  | 0.000   | 476   | 2011, 2014                      | 5.29 | 0.000   | 490   |
| 2011, 2015                         | 2.72 | 0.008   | 485   | 2011, 2015                      | 4.94 | 0.000   | 2275  | 2011, 2015                      | 4.23  | 0.000   | 223   | 2011, 2015                      | 2.72 | 0.008   | 485   |
| 2011, 2016                         | 4.44 | 0.000   | 1421  | 2011, 2016                      | 6.12 | 0.000   | 2005  | 2011, 2016                      | 4.56  | 0.000   | 808   | 2011, 2016                      | 4.44 | 0.000   | 1421  |
| 2011, 2017                         | 4.94 | 0.000   | 1741  | 2011, 2017                      | 6.87 | 0.000   | 2135  | 2011, 2017                      | 8.20  | 0.000   | 435   | 2011, 2017                      | 4.94 | 0.000   | 1741  |
| 2012, 2013                         | 0.72 | 0.470   | 524   | 2012, 2013                      | 1.40 | 0.175   | 1312  | 2012, 2013                      | 5.92  | 0.000   | 2471  | 2012, 2013                      | 0.72 | 0.470   | 524   |
| 2012, 2014                         | 0.18 | 0.862   | 416   | 2012, 2014                      | 5.58 | 0.000   | 418   | 2012, 2014                      | 10.56 | 0.000   | 461   | 2012, 2014                      | 0.18 | 0.862   | 416   |
| 2012, 2015                         | 1.38 | 0.172   | 427   | 2012, 2015                      | 5.97 | 0.000   | 1268  | 2012, 2015                      | 4.94  | 0.000   | 211   | 2012, 2015                      | 1.38 | 0.172   | 427   |
| 2012, 2016                         | 0.21 | 0.831   | 2192  | 2012, 2016                      | 7.55 | 0.000   | 1954  | 2012, 2016                      | 5.45  | 0.000   | 773   | 2012, 2016                      | 0.21 | 0.831   | 2192  |
| 2012, 2017                         | 0.15 | 0.882   | 2505  | 2012, 2017                      | 8.18 | 0.000   | 2168  | 2012, 2017                      | 8.93  | 0.000   | 424   | 2012, 2017                      | 0.15 | 0.882   | 2505  |
| 2013, 2014                         | 1.10 | 0.280   | 424   | 2013, 2014                      | 2.34 | 0.018   | 1487  | 2013, 2014                      | 1.36  | 0.180   | 2199  | 2013, 2014                      | 1.10 | 0.280   | 424   |
| 2013, 2015                         | 2.25 | 0.028   | 448   | 2013, 2015                      | 3.61 | 0.001   | 2659  | 2013, 2015                      | 3.69  | 0.000   | 2385  | 2013, 2015                      | 2.25 | 0.028   | 448   |
| 2013, 2016                         | 0.45 | 0.651   | 2245  | 2013, 2016                      | 4.29 | 0.000   | 2352  | 2013, 2016                      | 2.31  | 0.024   | 2678  | 2013, 2016                      | 0.45 | 0.651   | 2245  |
| 2013, 2017                         | 0.68 | 0.499   | 2572  | 2013, 2017                      | 5.56 | 0.000   | 2816  | 2013, 2017                      | 0.09  | 0.927   | 1792  | 2013, 2017                      | 0.68 | 0.499   | 2572  |
| 2014, 2015                         | 1.99 | 0.051   | 272   | 2014, 2015                      | 2.33 | 0.024   | 2195  | 2014, 2015                      | 4.25  | 0.000   | 448   | 2014, 2015                      | 1.99 | 0.051   | 272   |
| 2014, 2016                         | 0.60 | 0.548   | 1395  | 2014, 2016                      | 3.89 | 0.001   | 1804  | 2014, 2016                      | 2.86  | 0.006   | 884   | 2014, 2016                      | 0.60 | 0.548   | 1395  |
| 2014, 2017                         | 0.52 | 0.611   | 1681  | 2014, 2017                      | 4.97 | 0.000   | 1992  | 2014, 2017                      | 1.65  | 0.106   | 355   | 2014, 2017                      | 0.52 | 0.611   | 1681  |
| 2015, 2016                         | 1.98 | 0.053   | 1532  | 2015, 2016                      | 1.34 | 0.183   | 2130  | 2015, 2016                      | 0.67  | 0.510   | 892   | 2015, 2016                      | 1.98 | 0.053   | 1532  |
| 2015, 2017                         | 2.19 | 0.030   | 1792  | 2015, 2017                      | 2.19 | 0.034   | 4200  | 2015, 2017                      | 4.42  | 0.000   | 407   | 2015, 2017                      | 2.19 | 0.030   | 1792  |
| 2016, 2017                         | 0.14 | 0.887   | 3059  | 2016, 2017                      | 0.57 | 0.574   | 3647  | 2016, 2017                      | 3.22  | 0.003   | 998   | 2016, 2017                      | 0.14 | 0.887   | 3059  |

Table S6. Mean of coral species richness (per sample unit) per site and year. CP: Cuevas de Pedro, YE: Yemayá, VE: Veral, and VR: Verraco.

| Year | Site | AVE  | SD   |
|------|------|------|------|
| 2008 | CP   | 5,67 | 1,54 |
| 2008 | YE   | 5,93 | 2,19 |
| 2008 | VE   | 5,29 | 1,61 |
| 2008 | VR   | 4,60 | 1,06 |
| 2010 | CP   | 6,20 | 1,70 |
| 2010 | YE   | 5,93 | 1,58 |
| 2010 | VE   | 5,07 | 1,44 |
| 2010 | VR   | 4,20 | 0,94 |
| 2011 | CP   | 6,40 | 0,91 |
| 2011 | YE   | 5,40 | 0,99 |
| 2011 | VE   | 4,93 | 1,75 |
| 2011 | VR   | 5,07 | 1,39 |
| 2012 | CP   | 5,63 | 1,50 |
| 2012 | YE   | 5,87 | 1,81 |
| 2012 | VE   | 6,20 | 2,21 |
| 2012 | VR   | 4,60 | 1,24 |
| 2013 | CP   | 5,91 | 1,54 |
| 2013 | YE   | 6,33 | 1,91 |
| 2013 | VE   | 4,53 | 1,77 |
| 2013 | VR   | 4,94 | 1,26 |
| 2014 | CP   | 5,80 | 1,57 |
| 2014 | YE   | 5,53 | 1,30 |
| 2014 | VE   | 4,73 | 1,03 |
| 2014 | VR   | 4,80 | 1,78 |
| 2015 | CP   | 6,07 | 1,53 |
| 2015 | YE   | 4,69 | 1,62 |
| 2015 | VE   | 4,81 | 1,56 |
| 2015 | VR   | 5,00 | 2,30 |
| 2016 | CP   | 5,20 | 1,42 |
| 2016 | YE   | 5,09 | 2,12 |
| 2016 | VE   | 5,73 | 1,58 |
| 2016 | VR   | 5,46 | 1,85 |
| 2017 | CP   | 6,60 | 1,40 |
| 2017 | YE   | 6,07 | 1,49 |
| 2017 | VE   | 6,27 | 1,83 |
| 2017 | VR   | 6,38 | 2,29 |

Table S7. Pair wise test analysis for coral richness. CP: Cuevas de Pedro, YE: Yemayá, VE: Veral, and VR: Verraco, s: site.

| Within level 'CP' of factor 's' |          |              |       | Within level 'YE' of factor 's' |          |              |       | Within level 'VE' of factor 's' |          |              |       | Within level 'VR' of factor 's' |      |              |       |
|---------------------------------|----------|--------------|-------|---------------------------------|----------|--------------|-------|---------------------------------|----------|--------------|-------|---------------------------------|------|--------------|-------|
| Groups                          | t        | P(perm)      | perms | Groups                          | t        | P(perm)      | perms | Groups                          | t        | P(perm)      | perms | Groups                          | t    | P(perm)      | perms |
| 2008, 2010                      | 1.00     | 0.384        | 17    | 2008, 2010                      | 0.10     | 1.000        | 17    | 2008, 2010                      | 0.91     | 0.424        | 31    | 2008, 2010                      | 0.62 | 0.642        | 12    |
| 2008, 2011                      | 1.28     | 0.266        | 13    | 2008, 2011                      | 0.40     | 0.786        | 17    | 2008, 2011                      | 1.05     | 0.356        | 31    | 2008, 2011                      | 0.42 | 0.785        | 13    |
| 2008, 2012                      | 0.16     | 0.901        | 30    | 2008, 2012                      | 0.09     | 1.000        | 17    | 2008, 2012                      | 1.43     | 0.180        | 37    | 2008, 2012                      | 0.80 | 0.531        | 11    |
| 2008, 2013                      | 0.66     | 0.576        | 34    | 2008, 2013                      | 0.17     | 0.939        | 21    | 2008, 2013                      | 1.15     | 0.299        | 17    | 2008, 2013                      | 0.84 | 0.414        | 27    |
| 2008, 2014                      | 0.12     | 1.000        | 15    | 2008, 2014                      | 0.71     | 0.572        | 15    | 2008, 2014                      | 1.15     | 0.313        | 29    | 2008, 2014                      | 0.45 | 0.732        | 18    |
| 2008, 2015                      | 0.36     | 0.814        | 14    | 2008, 2015                      | 1.90     | 0.068        | 38    | 2008, 2015                      | 0.64     | 0.592        | 32    | 2008, 2015                      | 0.10 | 1.000        | 17    |
| 2008, 2016                      | 0.12     | 1.000        | 16    | 2008, 2016                      | 1.64     | 0.123        | 35    | 2008, 2016                      | 0.78     | 0.515        | 17    | 2008, 2016                      | 1.40 | 0.184        | 30    |
| 2008, 2017                      | 2.19     | 0.052        | 16    | 2008, 2017                      | 0.32     | 0.777        | 30    | 2008, 2017                      | 1.99     | 0.065        | 36    | 2008, 2017                      | 4.25 | <b>0.001</b> | 30    |
| 2010, 2011                      | negative |              |       | 2010, 2011                      | 0.38     | 0.806        | 13    | 2010, 2011                      | 0.13     | 1.000        | 13    | 2010, 2011                      | 1.01 | 0.391        | 12    |
| 2010, 2012                      | 0.90     | 0.442        | 16    | 2010, 2012                      | negative |              |       | 2010, 2012                      | 2.15     | <b>0.047</b> | 19    | 2010, 2012                      | 0.17 | 1.000        | 10    |
| 2010, 2013                      | 0.50     | 0.681        | 34    | 2010, 2013                      | 0.29     | 0.849        | 18    | 2010, 2013                      | 0.28     | 0.820        | 30    | 2010, 2013                      | 1.49 | 0.172        | 26    |
| 2010, 2014                      | 0.89     | 0.438        | 18    | 2010, 2014                      | 0.78     | 0.525        | 15    | 2010, 2014                      | 0.15     | 1.000        | 12    | 2010, 2014                      | 0.91 | 0.438        | 16    |
| 2010, 2015                      | 0.68     | 0.578        | 16    | 2010, 2015                      | 2.20     | <b>0.036</b> | 32    | 2010, 2015                      | 0.25     | 0.811        | 29    | 2010, 2015                      | 0.50 | 0.701        | 17    |
| 2010, 2016                      | 1.09     | 0.338        | 16    | 2010, 2016                      | 1.96     | 0.076        | 27    | 2010, 2016                      | 1.70     | 0.128        | 16    | 2010, 2016                      | 1.91 | 0.090        | 29    |
| 2010, 2017                      | 1.02     | 0.371        | 16    | 2010, 2017                      | 0.29     | 0.802        | 26    | 2010, 2017                      | 2.88     | <b>0.010</b> | 18    | 2010, 2017                      | 4.98 | <b>0.000</b> | 17    |
| 2011, 2012                      | 1.17     | 0.327        | 13    | 2011, 2012                      | 0.34     | 0.822        | 15    | 2011, 2012                      | 2.27     | <b>0.040</b> | 18    | 2011, 2012                      | 1.19 | 0.310        | 13    |
| 2011, 2013                      | 0.61     | 0.607        | 27    | 2011, 2013                      | 0.60     | 0.619        | 19    | 2011, 2013                      | 0.16     | 0.909        | 29    | 2011, 2013                      | 0.38 | 0.799        | 31    |
| 2011, 2014                      | 1.14     | 0.330        | 13    | 2011, 2014                      | 0.41     | 0.786        | 12    | 2011, 2014                      | negative |              |       | 2011, 2014                      | 0.11 | 1.000        | 18    |
| 2011, 2015                      | 0.89     | 0.465        | 14    | 2011, 2015                      | 1.93     | 0.067        | 30    | 2011, 2015                      | 0.38     | 0.725        | 28    | 2011, 2015                      | 0.19 | 0.929        | 20    |
| 2011, 2016                      | 1.39     | 0.224        | 14    | 2011, 2016                      | 1.73     | 0.095        | 27    | 2011, 2016                      | 1.84     | 0.099        | 14    | 2011, 2016                      | 1.00 | 0.357        | 30    |
| 2011, 2017                      | 1.33     | 0.255        | 12    | 2011, 2017                      | 0.10     | 1.000        | 26    | 2011, 2017                      | 3.03     | 0.009        | 20    | 2011, 2017                      | 3.60 | <b>0.001</b> | 29    |
| 2012, 2013                      | 0.52     | 0.659        | 31    | 2012, 2013                      | 0.27     | 0.855        | 19    | 2012, 2013                      | 2.36     | <b>0.030</b> | 38    | 2012, 2013                      | 1.68 | 0.123        | 26    |
| 2012, 2014                      | 0.03     | 1.000        | 30    | 2012, 2014                      | 0.70     | 0.573        | 16    | 2012, 2014                      | 2.43     | <b>0.026</b> | 17    | 2012, 2014                      | 1.04 | 0.358        | 17    |
| 2012, 2015                      | 0.22     | 0.903        | 28    | 2012, 2015                      | 2.01     | 0.059        | 34    | 2012, 2015                      | 1.94     | 0.072        | 36    | 2012, 2015                      | 0.60 | 0.624        | 19    |
| 2012, 2016                      | 0.28     | 0.817        | 30    | 2012, 2016                      | 1.76     | 0.108        | 33    | 2012, 2016                      | 0.76     | 0.514        | 19    | 2012, 2016                      | 2.07 | 0.063        | 28    |
| 2012, 2017                      | 2.15     | <b>0.046</b> | 30    | 2012, 2017                      | 0.26     | 0.817        | 27    | 2012, 2017                      | 0.28     | 0.856        | 20    | 2012, 2017                      | 5.27 | <b>0.000</b> | 28    |
| 2013, 2014                      | 0.53     | 0.657        | 33    | 2013, 2014                      | 0.90     | 0.421        | 17    | 2013, 2014                      | 0.17     | 0.901        | 29    | 2013, 2014                      | 0.19 | 0.918        | 34    |
| 2013, 2015                      | 0.27     | 0.818        | 33    | 2013, 2015                      | 2.07     | <b>0.048</b> | 42    | 2013, 2015                      | 0.52     | 0.659        | 32    | 2013, 2015                      | 0.48 | 0.632        | 39    |
| 2013, 2016                      | 0.78     | 0.452        | 32    | 2013, 2016                      | 1.79     | 0.091        | 36    | 2013, 2016                      | 1.89     | 0.075        | 36    | 2013, 2016                      | 0.76 | 0.489        | 30    |
| 2013, 2017                      | 1.76     | 0.098        | 33    | 2013, 2017                      | 0.51     | 0.611        | 36    | 2013, 2017                      | 3.04     | <b>0.008</b> | 20    | 2013, 2017                      | 3.50 | <b>0.003</b> | 30    |
| 2014, 2015                      | 0.24     | 0.901        | 16    | 2014, 2015                      | 1.58     | 0.124        | 30    | 2014, 2015                      | 0.42     | 0.691        | 25    | 2014, 2015                      | 0.25 | 0.869        | 22    |
| 2014, 2016                      | 0.23     | 0.911        | 15    | 2014, 2016                      | 1.42     | 0.189        | 25    | 2014, 2016                      | 2.05     | 0.069        | 15    | 2014, 2016                      | 0.75 | 0.480        | 36    |
| 2014, 2017                      | 2.07     | 0.064        | 16    | 2014, 2017                      | 0.51     | 0.680        | 24    | 2014, 2017                      | 3.34     | <b>0.004</b> | 19    | 2014, 2017                      | 2.76 | <b>0.013</b> | 34    |
| 2015, 2016                      | 0.48     | 0.718        | 15    | 2015, 2016                      | 0.02     | 1.000        | 26    | 2015, 2016                      | 1.41     | 0.184        | 30    | 2015, 2016                      | 0.92 | 0.375        | 38    |
| 2015, 2017                      | 1.88     | 0.092        | 17    | 2015, 2017                      | 1.99     | 0.060        | 30    | 2015, 2017                      | 2.58     | <b>0.022</b> | 36    | 2015, 2017                      | 2.67 | <b>0.018</b> | 39    |
| 2016, 2017                      | 2.27     | <b>0.042</b> | 17    | 2016, 2017                      | 1.79     | 0.092        | 27    | 2016, 2017                      | 1.21     | 0.270        | 17    | 2016, 2017                      | 2.06 | 0.057        | 30    |





Table S9. Pair wise test analysis for coral relative abundance. CP: Cuevas de Pedro, YE: Yemayá, VE: Veral, and VR: Verraco, s: site.

| Within level 'CP' of factor 's' |      |         |       | Within level 'YE' of factor 's' |      |         |       | Within level 'VE' of factor 's' |      |         |       | Within level 'VR' of factor 's' |      |         |       |
|---------------------------------|------|---------|-------|---------------------------------|------|---------|-------|---------------------------------|------|---------|-------|---------------------------------|------|---------|-------|
| Groups                          | t    | P(perm) | perms | Groups                          | t    | P(perm) | perms | Groups                          | t    | P(perm) | perms | Groups                          | t    | P(perm) | perms |
| 2008, 2010                      | 3.13 | 0.000   | 9943  | 2008, 2010                      | 1.50 | 0.028   | 9934  | 2008, 2010                      | 1.97 | 0.000   | 9944  | 2008, 2010                      | 1.99 | 0.001   | 9944  |
| 2008, 2011                      | 3.03 | 0.000   | 9950  | 2008, 2011                      | 1.76 | 0.002   | 9937  | 2008, 2011                      | 2.31 | 0.000   | 9935  | 2008, 2011                      | 1.54 | 0.054   | 9940  |
| 2008, 2012                      | 3.11 | 0.000   | 9947  | 2008, 2012                      | 1.47 | 0.044   | 9936  | 2008, 2012                      | 2.16 | 0.000   | 9940  | 2008, 2012                      | 2.41 | 0.001   | 9951  |
| 2008, 2013                      | 3.08 | 0.000   | 9949  | 2008, 2013                      | 1.31 | 0.110   | 9945  | 2008, 2013                      | 2.96 | 0.000   | 9950  | 2008, 2013                      | 2.59 | 0.000   | 9943  |
| 2008, 2014                      | 2.62 | 0.000   | 9943  | 2008, 2014                      | 1.28 | 0.131   | 9944  | 2008, 2014                      | 2.64 | 0.000   | 9945  | 2008, 2014                      | 1.82 | 0.010   | 9954  |
| 2008, 2015                      | 2.55 | 0.000   | 9944  | 2008, 2015                      | 1.67 | 0.006   | 9951  | 2008, 2015                      | 2.45 | 0.000   | 9937  | 2008, 2015                      | 1.55 | 0.022   | 9934  |
| 2008, 2016                      | 2.82 | 0.000   | 9941  | 2008, 2016                      | 1.54 | 0.023   | 9945  | 2008, 2016                      | 2.11 | 0.000   | 9943  | 2008, 2016                      | 2.20 | 0.000   | 9942  |
| 2008, 2017                      | 3.38 | 0.000   | 9938  | 2008, 2017                      | 1.94 | 0.000   | 9950  | 2008, 2017                      | 2.24 | 0.000   | 9947  | 2008, 2017                      | 2.01 | 0.000   | 9923  |
| 2010, 2011                      | 1.81 | 0.002   | 9952  | 2010, 2011                      | 1.44 | 0.047   | 9953  | 2010, 2011                      | 1.81 | 0.005   | 9933  | 2010, 2011                      | 1.36 | 0.090   | 9944  |
| 2010, 2012                      | 1.49 | 0.044   | 9949  | 2010, 2012                      | 1.19 | 0.227   | 9953  | 2010, 2012                      | 1.33 | 0.111   | 9934  | 2010, 2012                      | 1.70 | 0.011   | 9943  |
| 2010, 2013                      | 2.04 | 0.000   | 9939  | 2010, 2013                      | 1.24 | 0.175   | 9936  | 2010, 2013                      | 2.35 | 0.000   | 9948  | 2010, 2013                      | 2.09 | 0.000   | 9926  |
| 2010, 2014                      | 1.53 | 0.042   | 9949  | 2010, 2014                      | 1.14 | 0.266   | 9950  | 2010, 2014                      | 1.85 | 0.002   | 9946  | 2010, 2014                      | 0.88 | 0.606   | 9938  |
| 2010, 2015                      | 1.64 | 0.010   | 9934  | 2010, 2015                      | 1.58 | 0.017   | 9944  | 2010, 2015                      | 1.72 | 0.008   | 9948  | 2010, 2015                      | 1.32 | 0.095   | 9943  |
| 2010, 2016                      | 1.81 | 0.003   | 9955  | 2010, 2016                      | 0.69 | 0.804   | 9953  | 2010, 2016                      | 1.32 | 0.118   | 9953  | 2010, 2016                      | 0.95 | 0.509   | 9948  |
| 2010, 2017                      | 2.27 | 0.000   | 9942  | 2010, 2017                      | 1.31 | 0.143   | 9955  | 2010, 2017                      | 1.61 | 0.017   | 9967  | 2010, 2017                      | 0.86 | 0.655   | 9942  |
| 2011, 2012                      | 1.36 | 0.078   | 9945  | 2011, 2012                      | 1.66 | 0.016   | 9943  | 2011, 2012                      | 0.99 | 0.467   | 9939  | 2011, 2012                      | 1.71 | 0.012   | 9955  |
| 2011, 2013                      | 1.33 | 0.106   | 9964  | 2011, 2013                      | 1.82 | 0.004   | 9950  | 2011, 2013                      | 1.55 | 0.032   | 9949  | 2011, 2013                      | 1.91 | 0.003   | 9950  |
| 2011, 2014                      | 1.55 | 0.032   | 9945  | 2011, 2014                      | 1.55 | 0.023   | 9948  | 2011, 2014                      | 1.57 | 0.032   | 9947  | 2011, 2014                      | 1.32 | 0.142   | 9935  |
| 2011, 2015                      | 1.06 | 0.370   | 9953  | 2011, 2015                      | 2.01 | 0.000   | 9957  | 2011, 2015                      | 0.98 | 0.464   | 9946  | 2011, 2015                      | 1.47 | 0.054   | 9948  |
| 2011, 2016                      | 1.23 | 0.175   | 9939  | 2011, 2016                      | 1.65 | 0.021   | 9940  | 2011, 2016                      | 1.48 | 0.056   | 9945  | 2011, 2016                      | 1.50 | 0.058   | 9955  |
| 2011, 2017                      | 1.81 | 0.003   | 9937  | 2011, 2017                      | 1.96 | 0.002   | 9948  | 2011, 2017                      | 1.80 | 0.004   | 9940  | 2011, 2017                      | 1.55 | 0.042   | 9947  |
| 2012, 2013                      | 1.08 | 0.327   | 9947  | 2012, 2013                      | 1.32 | 0.110   | 9936  | 2012, 2013                      | 1.60 | 0.023   | 9954  | 2012, 2013                      | 2.09 | 0.001   | 9940  |
| 2012, 2014                      | 0.89 | 0.575   | 9958  | 2012, 2014                      | 0.78 | 0.712   | 9949  | 2012, 2014                      | 1.13 | 0.288   | 9971  | 2012, 2014                      | 2.05 | 0.004   | 9952  |
| 2012, 2015                      | 1.28 | 0.131   | 9950  | 2012, 2015                      | 1.74 | 0.005   | 9940  | 2012, 2015                      | 1.16 | 0.243   | 9950  | 2012, 2015                      | 2.05 | 0.001   | 9940  |
| 2012, 2016                      | 0.91 | 0.577   | 9927  | 2012, 2016                      | 0.78 | 0.693   | 9944  | 2012, 2016                      | 1.05 | 0.387   | 9954  | 2012, 2016                      | 2.11 | 0.001   | 9933  |
| 2012, 2017                      | 1.38 | 0.069   | 9954  | 2012, 2017                      | 1.03 | 0.390   | 9953  | 2012, 2017                      | 1.42 | 0.061   | 9949  | 2012, 2017                      | 2.25 | 0.000   | 9928  |
| 2013, 2014                      | 1.09 | 0.324   | 9946  | 2013, 2014                      | 1.61 | 0.023   | 9941  | 2013, 2014                      | 0.85 | 0.629   | 9956  | 2013, 2014                      | 1.82 | 0.009   | 9947  |
| 2013, 2015                      | 0.85 | 0.662   | 9939  | 2013, 2015                      | 2.28 | 0.000   | 9955  | 2013, 2015                      | 1.09 | 0.334   | 9949  | 2013, 2015                      | 1.61 | 0.011   | 9961  |
| 2013, 2016                      | 1.02 | 0.416   | 9957  | 2013, 2016                      | 1.30 | 0.137   | 9942  | 2013, 2016                      | 1.49 | 0.055   | 9953  | 2013, 2016                      | 1.95 | 0.001   | 9962  |
| 2013, 2017                      | 1.70 | 0.006   | 9947  | 2013, 2017                      | 2.07 | 0.001   | 9951  | 2013, 2017                      | 1.61 | 0.018   | 9960  | 2013, 2017                      | 2.05 | 0.000   | 9943  |
| 2014, 2015                      | 0.61 | 0.862   | 9939  | 2014, 2015                      | 1.41 | 0.061   | 9945  | 2014, 2015                      | 1.21 | 0.203   | 9950  | 2014, 2015                      | 1.08 | 0.322   | 9933  |
| 2014, 2016                      | 0.57 | 0.894   | 9949  | 2014, 2016                      | 1.26 | 0.164   | 9956  | 2014, 2016                      | 1.30 | 0.141   | 9942  | 2014, 2016                      | 0.56 | 0.887   | 9953  |
| 2014, 2017                      | 0.96 | 0.488   | 9946  | 2014, 2017                      | 1.16 | 0.240   | 9940  | 2014, 2017                      | 1.55 | 0.027   | 9952  | 2014, 2017                      | 0.53 | 0.910   | 9941  |
| 2015, 2016                      | 0.72 | 0.807   | 9951  | 2015, 2016                      | 1.78 | 0.007   | 9957  | 2015, 2016                      | 1.32 | 0.117   | 9943  | 2015, 2016                      | 1.16 | 0.230   | 9944  |
| 2015, 2017                      | 1.31 | 0.109   | 9950  | 2015, 2017                      | 1.77 | 0.004   | 9950  | 2015, 2017                      | 1.43 | 0.067   | 9956  | 2015, 2017                      | 1.08 | 0.320   | 9934  |
| 2016, 2017                      | 0.60 | 0.890   | 9944  | 2016, 2017                      | 0.83 | 0.593   | 9934  | 2016, 2017                      | 0.60 | 0.879   | 9954  | 2016, 2017                      | 0.47 | 0.940   | 9880  |

Table S10. Relative abundance (%) of coral traits groups per site and year. CP: Cuevas de Pedro, YE: Yemayá, VE: Veral, and VR: Verraco.

| Year                                             | 2008 | 2008 | 2008 | 2008 | 2010 | 2010 | 2010 | 2010 | 2011 | 2011 | 2011 | 2011 | 2012 | 2012 | 2012 | 2012 | 2013 | 2013 | 2013 | 2013 | 2014 | 2014 | 2014 | 2014 | 2015 | 2015 | 2015 | 2015 | 2016 | 2016 | 2016 | 2016 | 2017 | 2017 | 2017 | 2017 |
|--------------------------------------------------|------|------|------|------|------|------|------|------|------|------|------|------|------|------|------|------|------|------|------|------|------|------|------|------|------|------|------|------|------|------|------|------|------|------|------|------|
| Site                                             | CP   | YE   | VE   | VR   | CP   | YE   | VE   | VR   | CP   | YE   | VE   | VR   | CP   | YE   | VE   | VR   | CP   | YE   | VE   | VR   | CP   | YE   | VE   | VR   | CP   | YE   | VE   | VR   | CP   | YE   | VE   | VR   | CP   | YE   | VE   | VR   |
| Foliose-digitate species                         | 3    | 7    | 1    | 0    | 5    | 2    | 5    | 9    | 10   | 5    | 2    | 4    | 9    | 2    | 7    | 4    | 8    | 2    | 9    | 9    | 7    | 3    | 7    | 14   | 11   | 1    | 11   | 9    | 12   | 3    | 2    | 15   | 15   | 5    | 7    | 16   |
| Framework-building branching corals              | 0    | 2    | 0    | 0    | 1    | 2    | 0    | 0    | 2    | 0    | 0    | 0    | 1    | 0    | 1    | 0    | 1    | 1    | 0    | 1    | 3    | 2    | 0    | 0    | 4    | 0    | 0    | 3    | 0    | 0    | 0    | 2    | 0    | 0    | 0    |      |
| Massive reef framework-building corals           | 35   | 23   | 31   | 10   | 24   | 23   | 28   | 18   | 29   | 22   | 19   | 23   | 19   | 18   | 15   | 25   | 24   | 28   | 16   | 13   | 14   | 17   | 16   | 12   | 28   | 13   | 13   | 9    | 10   | 23   | 21   | 15   | 6    | 11   | 15   | 10   |
| Non-framework-building corals                    | 30   | 31   | 25   | 36   | 44   | 44   | 35   | 39   | 29   | 39   | 49   | 38   | 42   | 41   | 47   | 51   | 43   | 27   | 52   | 57   | 54   | 49   | 50   | 41   | 39   | 60   | 47   | 39   | 45   | 41   | 42   | 37   | 50   | 51   | 42   | 39   |
| Secondary Massive reef framework-building corals | 32   | 37   | 43   | 54   | 27   | 29   | 32   | 34   | 30   | 33   | 30   | 35   | 28   | 38   | 30   | 20   | 24   | 41   | 23   | 20   | 21   | 30   | 26   | 32   | 18   | 26   | 30   | 43   | 31   | 32   | 34   | 33   | 26   | 32   | 36   | 35   |

Table S11. Pair wise test analysis for relative abundance of coral traits groups. CP: Cuevas de Pedro, YE: Yemayá, VE: Veral, and VR: Verraco, s: site.

| Within level 'CP' of factor 's' |      |         |       | Within level 'YE' of factor 's' |      |         |       | Within level 'VE' of factor 's' |          |         |       | Within level 'VR' of factor 's' |        |         |       |
|---------------------------------|------|---------|-------|---------------------------------|------|---------|-------|---------------------------------|----------|---------|-------|---------------------------------|--------|---------|-------|
| Groups                          | t    | P(perm) | perms | Groups                          | t    | P(perm) | perms | Groups                          | t        | P(perm) | perms | Groups                          | t      | P(perm) | perms |
| 2008, 2010                      | 2.85 | 0.000   | 9950  | 2008, 2010                      | 1.62 | 0.037   | 9961  | 2008, 2010                      | 3.26     | 0.000   | 9961  | 2008, 2010                      | 3.27   | 0.000   | 9959  |
| 2008, 2011                      | 3.43 | 0.000   | 9954  | 2008, 2011                      | 1.81 | 0.011   | 9952  | 2008, 2011                      | 2.71     | 0.000   | 9958  | 2008, 2011                      | 2.34   | 0.003   | 9958  |
| 2008, 2012                      | 3.31 | 0.000   | 9943  | 2008, 2012                      | 1.65 | 0.038   | 9954  | 2008, 2012                      | 2.71     | 0.000   | 9947  | 2008, 2012                      | 3.07   | 0.000   | 9943  |
| 2008, 2013                      | 3.23 | 0.000   | 9950  | 2008, 2013                      | 1.03 | 0.382   | 9959  | 2008, 2013                      | 3.21     | 0.000   | 9950  | 2008, 2013                      | 3.19   | 0.000   | 9953  |
| 2008, 2014                      | 2.93 | 0.000   | 9945  | 2008, 2014                      | 1.56 | 0.068   | 9947  | 2008, 2014                      | 2.98     | 0.000   | 9968  | 2008, 2014                      | 2.62   | 0.000   | 9949  |
| 2008, 2015                      | 2.98 | 0.000   | 9943  | 2008, 2015                      | 2.43 | 0.001   | 9952  | 2008, 2015                      | 3.30     | 0.000   | 9944  | 2008, 2015                      | 1.21   | 0.225   | 9956  |
| 2008, 2016                      | 3.41 | 0.000   | 9958  | 2008, 2016                      | 1.69 | 0.029   | 9945  | 2008, 2016                      | 2.33     | 0.001   | 9962  | 2008, 2016                      | 2.73   | 0.000   | 9947  |
| 2008, 2017                      | 3.84 | 0.000   | 9958  | 2008, 2017                      | 2.36 | 0.001   | 9938  | 2008, 2017                      | 2.23     | 0.002   | 9948  | 2008, 2017                      | 2.71   | 0.000   | 9964  |
| 2010, 2011                      | 1.49 | 0.076   | 9966  | 2010, 2011                      | 1.70 | 0.030   | 9954  | 2010, 2011                      | 1.58     | 0.068   | 9958  | 2010, 2011                      | 2.01   | 0.009   | 9970  |
| 2010, 2012                      | 1.04 | 0.369   | 9957  | 2010, 2012                      | 1.66 | 0.059   | 9972  | 2010, 2012                      | 1.67     | 0.044   | 9963  | 2010, 2012                      | 2.06   | 0.005   | 9962  |
| 2010, 2013                      | 0.61 | 0.777   | 9949  | 2010, 2013                      | 2.01 | 0.009   | 9958  | 2010, 2013                      | 1.95     | 0.017   | 9964  | 2010, 2013                      | 2.41   | 0.001   | 9961  |
| 2010, 2014                      | 1.30 | 0.165   | 9952  | 2010, 2014                      | 1.09 | 0.339   | 9960  | 2010, 2014                      | 1.88     | 0.019   | 9949  | 2010, 2014                      | 1.45   | 0.103   | 9964  |
| 2010, 2015                      | 1.21 | 0.222   | 9951  | 2010, 2015                      | 1.95 | 0.016   | 9955  | 2010, 2015                      | 1.91     | 0.011   | 9952  | 2010, 2015                      | 2.20   | 0.002   | 9958  |
| 2010, 2016                      | 1.78 | 0.013   | 9957  | 2010, 2016                      | 1.03 | 0.405   | 9953  | 2010, 2016                      | 0.92     | 0.488   | 9950  | 2010, 2016                      | 1.17   | 0.279   | 9957  |
| 2010, 2017                      | 2.32 | 0.001   | 9963  | 2010, 2017                      | 1.67 | 0.047   | 9958  | 2010, 2017                      | 1.48     | 0.085   | 9934  | 2010, 2017                      | 2.28   | 0.001   | 9962  |
| 2011, 2012                      | 1.75 | 0.023   | 9963  | 2011, 2012                      | 1.97 | 0.009   | 9961  | 2011, 2012                      | 0.44     | 0.890   | 9952  | 2011, 2012                      | 1.57   | 0.067   | 9955  |
| 2011, 2013                      | 1.68 | 0.040   | 9947  | 2011, 2013                      | 2.00 | 0.008   | 9952  | 2011, 2013                      | 0.83     | 0.597   | 9959  | 2011, 2013                      | 2.23   | 0.001   | 9960  |
| 2011, 2014                      | 2.06 | 0.007   | 9946  | 2011, 2014                      | 2.17 | 0.002   | 9967  | 2011, 2014                      | 0.49     | 0.860   | 9953  | 2011, 2014                      | 1.44   | 0.121   | 9969  |
| 2011, 2015                      | 1.33 | 0.143   | 9963  | 2011, 2015                      | 3.08 | 0.000   | 9954  | 2011, 2015                      | 1.16     | 0.281   | 9958  | 2011, 2015                      | 1.48   | 0.073   | 9958  |
| 2011, 2016                      | 2.08 | 0.004   | 9956  | 2011, 2016                      | 0.14 | 0.912   | 9957  | 2011, 2016                      | 1.10     | 0.323   | 9953  | 2011, 2016                      | 1.65   | 0.056   | 9954  |
| 2011, 2017                      | 3.21 | 0.000   | 9957  | 2011, 2017                      | 2.17 | 0.002   | 9946  | 2011, 2017                      | 1.24     | 0.229   | 9964  | 2011, 2017                      | 1.99   | 0.007   | 9958  |
| 2012, 2013                      | 0.78 | 0.623   | 9971  | 2012, 2013                      | 1.44 | 0.111   | 9961  | 2012, 2013                      | 0.65     | 0.761   | 9970  | 2012, 2013                      | 1.38   | 0.123   | 9954  |
| 2012, 2014                      | 0.71 | 0.712   | 9961  | 2012, 2014                      | 1.31 | 0.190   | 9960  | 2012, 2014                      | Negative |         |       | 2012, 2014                      | 1.92   | 0.011   | 9955  |
| 2012, 2015                      | 1.60 | 0.042   | 9960  | 2012, 2015                      | 2.23 | 0.010   | 9962  | 2012, 2015                      | 1.14     | 0.294   | 9948  | 2012, 2015                      | 1.96   | 0.005   | 9952  |
| 2012, 2016                      | 0.66 | 0.749   | 9953  | 2012, 2016                      | 1.66 | 0.056   | 9952  | 2012, 2016                      | 0.84     | 0.581   | 9947  | 2012, 2016                      | 2.06   | 0.002   | 9946  |
| 2012, 2017                      | 1.36 | 0.135   | 9951  | 2012, 2017                      | 1.77 | 0.041   | 9948  | 2012, 2017                      | 0.51     | 0.855   | 9940  | 2012, 2017                      | 2.53   | 0.000   | 9962  |
| 2013, 2014                      | 0.86 | 0.556   | 9954  | 2013, 2014                      | 2.10 | 0.007   | 9959  | 2013, 2014                      | Negative |         |       | 2013, 2014                      | 1.80   | 0.019   | 9963  |
| 2013, 2015                      | 1.14 | 0.275   | 9928  | 2013, 2015                      | 3.14 | 0.000   | 9975  | 2013, 2015                      | 1.18     | 0.257   | 9960  | 2013, 2015                      | 1.81   | 0.010   | 9960  |
| 2013, 2016                      | 1.50 | 0.073   | 9955  | 2013, 2016                      | 1.79 | 0.027   | 9950  | 2013, 2016                      | 1.43     | 0.111   | 9971  | 2013, 2016                      | 1.91   | 0.007   | 9955  |
| 2013, 2017                      | 1.99 | 0.007   | 9961  | 2013, 2017                      | 2.89 | 0.000   | 9950  | 2013, 2017                      | 1.29     | 0.178   | 9951  | 2013, 2017                      | 2.06   | 0.004   | 9945  |
| 2014, 2015                      | 1.36 | 0.128   | 9966  | 2014, 2015                      | 1.19 | 0.260   | 9951  | 2014, 2015                      | 1.12     | 0.315   | 9964  | 2014, 2015                      | 1.37   | 0.123   | 9955  |
| 2014, 2016                      | 0.77 | 0.642   | 9940  | 2014, 2016                      | 1.70 | 0.035   | 9951  | 2014, 2016                      | 1.29     | 0.174   | 9953  | 2014, 2016                      | 0.36   | 0.896   | 9958  |
| 2014, 2017                      | 0.83 | 0.572   | 9962  | 2014, 2017                      | 1.35 | 0.152   | 9954  | 2014, 2017                      | 1.15     | 0.281   | 9946  | 2014, 2017                      | 0.68   | 0.725   | 9959  |
| 2015, 2016                      | 1.91 | 0.004   | 9952  | 2015, 2016                      | 2.39 | 0.001   | 9947  | 2015, 2016                      | 1.81     | 0.023   | 9960  | 2015, 2016                      | 1.53   | 0.066   | 9954  |
| 2015, 2017                      | 2.56 | 0.000   | 9946  | 2015, 2017                      | 1.82 | 0.029   | 9954  | 2015, 2017                      | 1.47     | 0.075   | 9957  | 2015, 2017                      | 1.28   | 0.170   | 9959  |
| 2016, 2017                      | 1.13 | 0.306   | 9949  | 2016, 2017                      | 1.49 | 0.099   | 9916  | 2016, 2017                      | 0.64     | 0.750   | 9943  | 2016, 2017                      | 0.8187 | 0.592   | 9921  |

Table S12. Mean and standard deviation of the reef functional index per site and year. CP: Cuevas de Pedro, YE: Yemayá, VE: Veral, and VR: Verraco.

| Year | Site | AVE  | SD   |
|------|------|------|------|
| 2008 | CP   | 0,50 | 0,04 |
| 2008 | YE   | 0,43 | 0,05 |
| 2008 | VE   | 0,44 | 0,07 |
| 2008 | VR   | 0,40 | 0,04 |
| 2010 | CP   | 0,40 | 0,03 |
| 2010 | YE   | 0,40 | 0,04 |
| 2010 | VE   | 0,37 | 0,02 |
| 2010 | VR   | 0,34 | 0,04 |
| 2011 | CP   | 0,41 | 0,02 |
| 2011 | YE   | 0,38 | 0,03 |
| 2011 | VE   | 0,37 | 0,04 |
| 2011 | VR   | 0,39 | 0,03 |
| 2012 | CP   | 0,40 | 0,03 |
| 2012 | YE   | 0,40 | 0,04 |
| 2012 | VE   | 0,39 | 0,03 |
| 2012 | VR   | 0,37 | 0,05 |
| 2013 | CP   | 0,41 | 0,03 |
| 2013 | YE   | 0,41 | 0,04 |
| 2013 | VE   | 0,38 | 0,03 |
| 2013 | VR   | 0,38 | 0,05 |
| 2014 | CP   | 0,40 | 0,04 |
| 2014 | YE   | 0,41 | 0,03 |
| 2014 | VE   | 0,37 | 0,03 |
| 2014 | VR   | 0,37 | 0,04 |
| 2015 | CP   | 0,43 | 0,03 |
| 2015 | YE   | 0,40 | 0,04 |
| 2015 | VE   | 0,35 | 0,04 |
| 2015 | VR   | 0,37 | 0,06 |
| 2016 | CP   | 0,38 | 0,04 |
| 2016 | YE   | 0,38 | 0,04 |
| 2016 | VE   | 0,38 | 0,03 |
| 2016 | VR   | 0,37 | 0,03 |
| 2017 | CP   | 0,40 | 0,03 |
| 2017 | YE   | 0,38 | 0,02 |
| 2017 | VE   | 0,39 | 0,03 |
| 2017 | VR   | 0,39 | 0,02 |

Table S13. Pair wise test analysis for the reef functional index. CP: Cuevas de Pedro, YE: Yemayá, VE: Veral, and VR: Verraco, s: site.

| Within level 'CP' of factor 's' |      |         |       | Within level 'YE' of factor 's' |      |         |       | Within level 'VE' of factor 's' |      |         |       | Within level 'VR' of factor 's' |          |         |       |
|---------------------------------|------|---------|-------|---------------------------------|------|---------|-------|---------------------------------|------|---------|-------|---------------------------------|----------|---------|-------|
| Groups                          | t    | P(perm) | perms | Groups                          | t    | P(perm) | perms | Groups                          | t    | P(perm) | perms | Groups                          | t        | P(perm) | perms |
| 2008, 2010                      | 6.95 | 0.000   | 60    | 2008, 2010                      | 1.57 | 0.136   | 46    | 2008, 2010                      | 3.71 | 0.001   | 120   | 2008, 2010                      | 4.54     | 0.000   | 49    |
| 2008, 2011                      | 6.53 | 0.000   | 51    | 2008, 2011                      | 3.24 | 0.003   | 50    | 2008, 2011                      | 3.42 | 0.002   | 128   | 2008, 2011                      | 0.98     | 0.366   | 38    |
| 2008, 2012                      | 6.80 | 0.000   | 110   | 2008, 2012                      | 1.83 | 0.082   | 48    | 2008, 2012                      | 2.60 | 0.017   | 111   | 2008, 2012                      | 1.98     | 0.066   | 46    |
| 2008, 2013                      | 7.19 | 0.000   | 113   | 2008, 2013                      | 0.88 | 0.399   | 49    | 2008, 2013                      | 3.38 | 0.002   | 62    | 2008, 2013                      | 1.49     | 0.157   | 86    |
| 2008, 2014                      | 6.47 | 0.000   | 62    | 2008, 2014                      | 1.23 | 0.240   | 42    | 2008, 2014                      | 3.49 | 0.002   | 118   | 2008, 2014                      | 2.08     | 0.055   | 40    |
| 2008, 2015                      | 5.21 | 0.000   | 49    | 2008, 2015                      | 1.87 | 0.080   | 90    | 2008, 2015                      | 4.36 | 0.000   | 132   | 2008, 2015                      | 1.76     | 0.087   | 48    |
| 2008, 2016                      | 7.88 | 0.000   | 68    | 2008, 2016                      | 2.57 | 0.014   | 93    | 2008, 2016                      | 2.93 | 0.008   | 117   | 2008, 2016                      | 2.16     | 0.045   | 70    |
| 2008, 2017                      | 7.52 | 0.000   | 59    | 2008, 2017                      | 3.07 | 0.007   | 83    | 2008, 2017                      | 2.84 | 0.008   | 117   | 2008, 2017                      | 1.20     | 0.274   | 28    |
| 2010, 2011                      | 1.04 | 0.339   | 24    | 2010, 2011                      | 2.12 | 0.052   | 32    | 2010, 2011                      | 0.06 | 1.000   | 30    | 2010, 2011                      | 4.10     | 0.000   | 40    |
| 2010, 2012                      | 0.09 | 0.953   | 59    | 2010, 2012                      | 0.35 | 0.760   | 33    | 2010, 2012                      | 1.86 | 0.085   | 27    | 2010, 2012                      | 2.08     | 0.054   | 42    |
| 2010, 2013                      | 0.91 | 0.389   | 61    | 2010, 2013                      | 0.73 | 0.499   | 37    | 2010, 2013                      | 0.77 | 0.464   | 54    | 2010, 2013                      | 2.63     | 0.012   | 89    |
| 2010, 2014                      | 0.00 | 1.000   | 31    | 2010, 2014                      | 0.64 | 0.563   | 29    | 2010, 2014                      | 0.13 | 0.950   | 28    | 2010, 2014                      | 2.61     | 0.017   | 36    |
| 2010, 2015                      | 2.11 | 0.054   | 30    | 2010, 2015                      | 0.35 | 0.769   | 67    | 2010, 2015                      | 1.39 | 0.183   | 56    | 2010, 2015                      | 1.83     | 0.081   | 45    |
| 2010, 2016                      | 2.06 | 0.050   | 32    | 2010, 2016                      | 1.59 | 0.124   | 69    | 2010, 2016                      | 1.35 | 0.217   | 26    | 2010, 2016                      | 2.54     | 0.020   | 66    |
| 2010, 2017                      | 0.59 | 0.605   | 26    | 2010, 2017                      | 1.94 | 0.074   | 56    | 2010, 2017                      | 1.31 | 0.226   | 28    | 2010, 2017                      | 4.42     | 0.000   | 36    |
| 2011, 2012                      | 0.89 | 0.414   | 54    | 2011, 2012                      | 1.69 | 0.113   | 32    | 2011, 2012                      | 1.42 | 0.177   | 37    | 2011, 2012                      | 1.29     | 0.220   | 39    |
| 2011, 2013                      | 0.14 | 0.900   | 57    | 2011, 2013                      | 2.66 | 0.017   | 37    | 2011, 2013                      | 0.56 | 0.592   | 65    | 2011, 2013                      | 0.72     | 0.509   | 77    |
| 2011, 2014                      | 0.91 | 0.405   | 30    | 2011, 2014                      | 3.26 | 0.003   | 30    | 2011, 2014                      | 0.05 | 1.000   | 35    | 2011, 2014                      | 1.31     | 0.219   | 34    |
| 2011, 2015                      | 1.28 | 0.247   | 24    | 2011, 2015                      | 1.73 | 0.097   | 62    | 2011, 2015                      | 1.19 | 0.251   | 69    | 2011, 2015                      | 1.12     | 0.302   | 42    |
| 2011, 2016                      | 3.02 | 0.003   | 32    | 2011, 2016                      | 0.00 | 1.000   | 59    | 2011, 2016                      | 0.99 | 0.346   | 34    | 2011, 2016                      | 1.44     | 0.175   | 58    |
| 2011, 2017                      | 1.72 | 0.105   | 26    | 2011, 2017                      | 0.37 | 0.766   | 45    | 2011, 2017                      | 0.99 | 0.347   | 38    | 2011, 2017                      | 0.17     | 0.889   | 49    |
| 2012, 2013                      | 0.78 | 0.444   | 65    | 2012, 2013                      | 1.04 | 0.337   | 36    | 2012, 2013                      | 1.02 | 0.328   | 62    | 2012, 2013                      | 0.49     | 0.643   | 92    |
| 2012, 2014                      | 0.08 | 0.959   | 64    | 2012, 2014                      | 1.02 | 0.344   | 30    | 2012, 2014                      | 1.49 | 0.168   | 31    | 2012, 2014                      | 0.17     | 0.899   | 42    |
| 2012, 2015                      | 1.94 | 0.064   | 60    | 2012, 2015                      | 0.01 | 1.000   | 66    | 2012, 2015                      | 2.77 | 0.009   | 72    | 2012, 2015                      | legative |         |       |
| 2012, 2016                      | 2.10 | 0.046   | 69    | 2012, 2016                      | 1.27 | 0.229   | 68    | 2012, 2016                      | 0.52 | 0.654   | 30    | 2012, 2016                      | 0.09     | 0.968   | 37    |
| 2012, 2017                      | 0.66 | 0.547   | 56    | 2012, 2017                      | 1.48 | 0.156   | 52    | 2012, 2017                      | 0.43 | 0.702   | 32    | 2012, 2017                      | 1.23     | 0.243   | 64    |
| 2013, 2014                      | 0.83 | 0.436   | 63    | 2013, 2014                      | 0.25 | 0.842   | 32    | 2013, 2014                      | 0.55 | 0.595   | 59    | 2013, 2014                      | 0.37     | 0.743   | 81    |
| 2013, 2015                      | 1.42 | 0.178   | 63    | 2013, 2015                      | 1.05 | 0.310   | 75    | 2013, 2015                      | 1.94 | 0.056   | 64    | 2013, 2015                      | 0.45     | 0.684   | 92    |
| 2013, 2016                      | 3.10 | 0.003   | 73    | 2013, 2016                      | 2.06 | 0.053   | 77    | 2013, 2016                      | 0.52 | 0.606   | 58    | 2013, 2016                      | 0.44     | 0.691   | 76    |
| 2013, 2017                      | 1.57 | 0.126   | 57    | 2013, 2017                      | 2.50 | 0.018   | 64    | 2013, 2017                      | 0.54 | 0.591   | 65    | 2013, 2017                      | 0.62     | 0.589   | 68    |
| 2014, 2015                      | 1.89 | 0.080   | 33    | 2014, 2015                      | 1.03 | 0.326   | 58    | 2014, 2015                      | 1.34 | 0.208   | 64    | 2014, 2015                      | 0.15     | 0.918   | 43    |
| 2014, 2016                      | 1.90 | 0.078   | 35    | 2014, 2016                      | 2.35 | 0.030   | 64    | 2014, 2016                      | 1.03 | 0.348   | 29    | 2014, 2016                      | 0.09     | 0.956   | 64    |
| 2014, 2017                      | 0.52 | 0.644   | 31    | 2014, 2017                      | 3.25 | 0.003   | 49    | 2014, 2017                      | 1.02 | 0.346   | 32    | 2014, 2017                      | 1.30     | 0.217   | 55    |
| 2015, 2016                      | 3.79 | 0.000   | 37    | 2015, 2016                      | 1.31 | 0.204   | 73    | 2015, 2016                      | 2.37 | 0.023   | 64    | 2015, 2016                      | 0.08     | 0.974   | 39    |
| 2015, 2017                      | 2.74 | 0.011   | 28    | 2015, 2017                      | 1.52 | 0.141   | 54    | 2015, 2017                      | 2.30 | 0.029   | 65    | 2015, 2017                      | 1.04     | 0.342   | 69    |
| 2016, 2017                      | 1.62 | 0.137   | 31    | 2016, 2017                      | 0.26 | 0.806   | 56    | 2016, 2017                      | 0.06 | 1.000   | 31    | 2016, 2017                      | 1.51     | 0.167   | 24    |

Table S14. Mean (AVE) and standard deviation (SD) of abiotic variables per site and year. CP: Cuevas de Pedro, YE: Yemayá, VE: Veral, and VR: Verraco.

| Variable                                       | Sites | Years |       |       |       |       |       |       |       |       |
|------------------------------------------------|-------|-------|-------|-------|-------|-------|-------|-------|-------|-------|
|                                                |       | 2007  | 2009  | 2010  | 2011  | 2012  | 2013  | 2014  | 2015  | 2016  |
| AVE WAVE (m)                                   | CP    | 0.44  | 0.33  | 0.47  | 0.59  | 0.42  | 0.68  | 0.44  | 0.23  | 0.74  |
|                                                | YE    | 0.41  | 0.31  | 0.43  | 0.55  | 0.42  | 0.64  | 0.45  | 0.21  | 0.74  |
|                                                | VE    | 0.31  | 0.29  | 0.43  | 0.42  | 0.26  | 0.40  | 0.24  | 0.17  | 0.48  |
|                                                | VR    | 0.44  | 0.33  | 0.47  | 0.59  | 0.42  | 0.68  | 0.44  | 0.23  | 0.74  |
| SD WAVE (m)                                    | CP    | 0.32  | 0.32  | 0.29  | 0.21  | 0.43  | 0.40  | 0.21  | 0.29  | 0.56  |
|                                                | YE    | 0.32  | 0.32  | 0.29  | 0.21  | 0.43  | 0.40  | 0.21  | 0.29  | 0.56  |
|                                                | VE    | 0.25  | 0.33  | 0.42  | 0.15  | 0.33  | 0.23  | 0.10  | 0.18  | 0.44  |
|                                                | VR    | 0.32  | 0.32  | 0.29  | 0.21  | 0.43  | 0.40  | 0.21  | 0.29  | 0.56  |
| AVE NSST (°C)                                  | CP    | 28.0  | 28.1  | 27.6  | 28.3  | 27.9  | 27.9  | 28.3  | 28.6  | 28.5  |
|                                                | YE    | 28.0  | 28.1  | 27.6  | 28.3  | 27.9  | 27.9  | 28.3  | 28.6  | 28.5  |
|                                                | VE    | 28.0  | 28.1  | 27.6  | 28.3  | 27.9  | 27.9  | 28.3  | 28.6  | 28.5  |
|                                                | VR    | 28.0  | 28.0  | 27.8  | 28.1  | 27.9  | 28.0  | 28.2  | 28.8  | 28.6  |
| SD NSST (°C)                                   | CP    | 1.3   | 1.8   | 1.7   | 1.8   | 1.3   | 1.0   | 1.5   | 1.4   | 1.4   |
|                                                | YE    | 1.3   | 1.8   | 1.7   | 1.8   | 1.3   | 1.0   | 1.5   | 1.4   | 1.4   |
|                                                | VE    | 1.3   | 1.8   | 1.7   | 1.8   | 1.3   | 1.0   | 1.5   | 1.4   | 1.4   |
|                                                | VR    | 1.2   | 1.7   | 1.6   | 1.6   | 1.3   | 0.9   | 1.4   | 1.3   | 1.3   |
| AVE DHW (°C)                                   | CP    | 1.2   | 4.8   | 0.8   | 0.0   | 1.2   | 0.0   | 0.0   | 3.7   | 3.5   |
|                                                | YE    | 1.1   | 3.8   | 0.8   | 0.0   | 0.9   | 0.0   | 0.0   | 3.5   | 1.9   |
|                                                | VE    | 0.9   | 3.3   | 1.6   | 0.0   | 0.0   | 0.0   | 0.0   | 3.6   | 3.3   |
|                                                | VR    | 0.9   | 2.8   | 0.9   | 0.0   | 0.9   | 0.0   | 0.0   | 4.1   | 3.6   |
| SD DHW (°C)                                    | CP    | 0.0   | 3.3   | 1.7   | 0.0   | 0.7   | 0.0   | 0.0   | 2.3   | 1.4   |
|                                                | YE    | 0.3   | 3.3   | 0.7   | 0.0   | 0.6   | 0.0   | 0.0   | 1.9   | 1.5   |
|                                                | VE    | 0.3   | 2.7   | 0.7   | 0.0   | 0.6   | 0.0   | 0.0   | 1.8   | 1.2   |
|                                                | VR    | 0.3   | 2.2   | 0.8   | 0.0   | 0.5   | 0.0   | 0.0   | 1.4   | 0.6   |
| AVE POC (mol m <sup>-3</sup> )                 | CP    | 41.3  | 37.1  | 39.6  | 35.2  | 41.2  | 46.5  | 37.0  | 37.7  | 44.5  |
|                                                | YE    | 41.9  | 37.1  | 39.6  | 35.2  | 39.6  | 46.5  | 37.0  | 37.1  | 44.5  |
|                                                | VE    | 38.7  | 36.0  | 35.8  | 33.2  | 38.0  | 42.8  | 34.4  | 35.1  | 46.4  |
|                                                | VR    | 40.6  | 36.7  | 35.8  | 35.1  | 32.6  | 43.9  | 34.1  | 35.0  | 45.9  |
| SD POC (mol m <sup>-3</sup> )                  | CP    | 7.8   | 8.8   | 6.9   | 7.0   | 13.7  | 13.2  | 7.2   | 6.0   | 9.6   |
|                                                | YE    | 7.2   | 8.8   | 6.9   | 7.0   | 10.8  | 13.2  | 7.2   | 6.2   | 9.6   |
|                                                | VE    | 7.4   | 8.2   | 8.4   | 6.7   | 12.1  | 14.4  | 9.0   | 6.3   | 12.7  |
|                                                | VR    | 9.2   | 8.2   | 5.5   | 5.9   | 8.1   | 10.9  | 9.1   | 5.8   | 16.1  |
| AVE CHL1 (mg m <sup>-3</sup> )                 | CP    | 0.13  | 0.11  | 0.12  | 0.11  | 0.12  | 0.15  | 0.11  | 0.11  | 0.14  |
|                                                | YE    | 0.12  | 0.13  | 0.12  | 0.12  | 0.12  | 0.13  | 0.11  | 0.12  | 0.14  |
|                                                | VE    | 0.13  | 0.12  | 0.12  | 0.12  | 0.13  | 0.15  | 0.12  | 0.12  | 0.15  |
|                                                | VR    | 0.14  | 0.14  | 0.11  | 0.15  | 0.12  | 0.14  | 0.11  | 0.12  | 0.16  |
| SD CHL1 (mg m <sup>-3</sup> )                  | CP    | 0.03  | 0.03  | 0.03  | 0.03  | 0.04  | 0.05  | 0.03  | 0.03  | 0.04  |
|                                                | YE    | 0.02  | 0.02  | 0.03  | 0.02  | 0.01  | 0.03  | 0.03  | 0.02  | 0.04  |
|                                                | VE    | 0.02  | 0.02  | 0.03  | 0.02  | 0.03  | 0.05  | 0.02  | 0.02  | 0.05  |
|                                                | VR    | 0.05  | 0.05  | 0.04  | 0.09  | 0.05  | 0.07  | 0.03  | 0.02  | 0.06  |
| AVE KD490 (m <sup>-1</sup> )                   | CP    | 0.029 | 0.028 | 0.030 | 0.027 | 0.029 | 0.034 | 0.028 | 0.028 | 0.033 |
|                                                | YE    | 0.030 | 0.027 | 0.029 | 0.025 | 0.028 | 0.034 | 0.028 | 0.027 | 0.032 |
|                                                | VE    | 0.028 | 0.027 | 0.026 | 0.024 | 0.026 | 0.031 | 0.026 | 0.025 | 0.033 |
|                                                | VR    | 0.030 | 0.029 | 0.026 | 0.027 | 0.027 | 0.031 | 0.027 | 0.027 | 0.034 |
| SD KD490 (m <sup>-1</sup> )                    | CP    | 0.004 | 0.005 | 0.004 | 0.005 | 0.007 | 0.007 | 0.005 | 0.003 | 0.006 |
|                                                | YE    | 0.005 | 0.004 | 0.004 | 0.004 | 0.006 | 0.008 | 0.006 | 0.003 | 0.006 |
|                                                | VE    | 0.004 | 0.005 | 0.005 | 0.004 | 0.007 | 0.009 | 0.006 | 0.002 | 0.008 |
|                                                | VR    | 0.005 | 0.005 | 0.004 | 0.007 | 0.008 | 0.010 | 0.006 | 0.003 | 0.009 |
| AVE PAR (E m <sup>-2</sup> day <sup>-1</sup> ) | CP    | 41.6  | 43.8  | 41.7  | 42.0  | 42.1  | 41.3  | 42.5  | 42.8  | 42.2  |
|                                                | YE    | 41.1  | 43.2  | 41.0  | 41.0  | 41.0  | 41.0  | 41.6  | 41.4  | 40.6  |
|                                                | VE    | 40.5  | 42.4  | 40.5  | 40.2  | 39.3  | 40.6  | 40.6  | 40.2  | 40.6  |
|                                                | VR    | 41.1  | 42.2  | 41.3  | 40.0  | 39.9  | 40.9  | 42.4  | 41.3  | 41.5  |
| SD PAR (E m <sup>-2</sup> day <sup>-1</sup> )  | CP    | 6.7   | 8.5   | 8.3   | 9.0   | 6.7   | 8.3   | 7.5   | 8.7   | 8.1   |
|                                                | YE    | 6.8   | 8.3   | 8.1   | 8.4   | 6.0   | 8.1   | 7.6   | 8.3   | 8.1   |
|                                                | VE    | 6.7   | 8.1   | 7.1   | 7.8   | 4.9   | 7.6   | 6.7   | 7.8   | 8.3   |
|                                                | VR    | 6.9   | 9.0   | 7.2   | 8.3   | 5.0   | 7.3   | 7.5   | 8.6   | 6.7   |

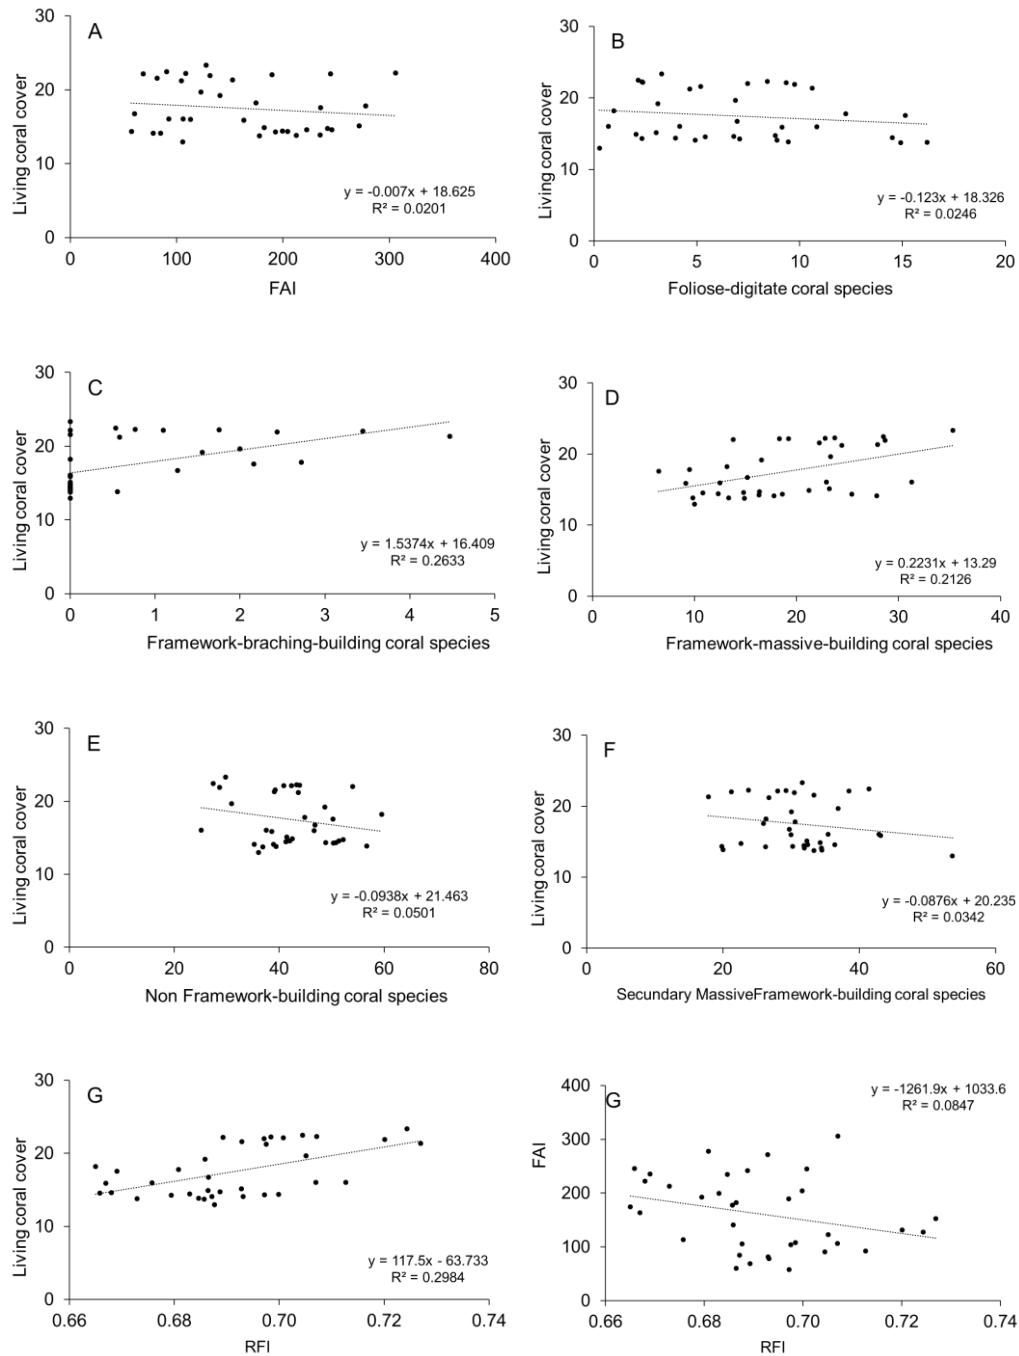

Figure S1. Correlation between biological variables of the Guanahacabibes study. FAI: fleshy algae index, RFI: reef functional index.

## References

González-Barrios FJ, Álvarez-Filip L. 2018. A framework for measuring coral species-specific contribution to reef functioning in the Caribbean. *Ecological Indicators* 95: 877–886 <https://doi.org/10.1016/j.ecoli.2018.08.038>
